# Supplementary material for: Ionophore-based ion-exchange emulsions as novel class of complexometric titration reagents
Source: Royal Society of Chemistry journal article supplement (doi:10.1039/c4cc05754f), 2014-01-01
Supplement: c4cc05754f1.pdf [file c4cc05754f1.pdf]

## Supporting information for

# Ionophore-Based Ion-Exchange Emulsions as Novel Class of Complexometric Titration Reagents

Jingying Zhai, Xiaojiang Xie, and Eric Bakker\*

## Experimental Section

### Reagents:

Pluronic F-127 (F127), bis(2-ethylhexyl)sebacate (DOS), 2-nitrophenyl octyl ether (o-NPOE), dodecyl 2-nitrophenyl ether (D-NPOE), tetradodecylammonium tetrakis(4-chlorophenyl)borate (ETH 500), tetrahydrofuran (THF), sodium tetrakis-[3,5-bis(trifluoromethyl)phenyl]borate (NaTFPB), potassium tetrakis[3,5-bis(trifluoromethyl)phenyl]borate (KTFPB), calcium ionophore II (ETH 129), calcium ionophore IV, lead ionophore IV, poly(vinyl chloride) (PVC), CaCl<sub>2</sub>, Pb(NO<sub>3</sub>)<sub>2</sub>, ethylenediaminetetraacetic acid disodium salt dehydrate (Na<sub>2</sub>EDTA), 2-amino-2-hydroxymethyl-propane-1,3-diol (Tris), hydrochloric acid (HCl) and Eriochrome Black T (EBT) were obtained from Sigma-Aldrich. Super pure nitric acid (65% w/w) was obtained from MERCK. Methyl methacrylate-decyl methacrylate copolymer (MMA-DMA) was synthesized in our group<sup>1</sup>. Arve River sample was obtained from Geneva, Switzerland.

### Preparation of Ca<sup>2+</sup>-selective and Pb<sup>2+</sup>-selective emulsion:

For Ca<sup>2+</sup>-selective emulsion, 2.24 mg of calcium ionophore II, 1.24 mg of KTFPB, 8.0 mg of D-NPOE and 3.0 mg of F127 were dissolved in 2.0 mL of THF to form a homogeneous solution. 0.5 mL of this THF solution was pipetted and injected into 3 mL of deionized water vortexing at 1000 rpm. Compressed air was blown on the surface for 30 min to remove THF.

For Pb<sup>2+</sup>-selective emulsion, 1.83 mg of lead ionophore IV, 0.63 mg of KTFPB, 6.08 mg of D-NPOE, and 2.48 mg of F127 were dissolved in 2.0 mL of THF, followed by the procedure above.

### Membranes and electrodes:

The Ca<sup>2+</sup>-selective membrane was prepared by dissolving the mixture composed of 16.5 mmol/kg of calcium ionophore IV, 6.9 mmol/kg NaTFPB, 63.1 wt% o-NPOE, and 33.5 wt% PVC in 1.5 mL THF. For Pb<sup>2+</sup>-selective membranes, the membranes optimized for low detection limits contained 0.74 mmol/kg lead ionophore IV, 0.34 mmol/kg NaTFPB, 10.98 mmol/kg ETH 500, 33.00 wt% MMA-DMA, 22.80 wt% DOS, 42.83 wt% PVC, and 0.17 mmol/kg Pb(NO<sub>3</sub>)<sub>2</sub>. The cocktail solution was then poured into a glass ring (22 mm in diameter) placed on a glass slide and dried overnight at room temperature under a dust-free environment. Small disks were punched from the cast films and conditioned for 2 days in 5×10<sup>-9</sup> M Pb(NO<sub>3</sub>)<sub>2</sub> (diluted by 10<sup>-4</sup> M HNO<sub>3</sub>) for Pb<sup>2+</sup>-selective membranes, and corresponding Ca<sup>2+</sup>-selective membranes in 5×10<sup>-9</sup> M CaCl<sub>2</sub>. The conditioned membranes were mounted separately in Ostec electrode bodies (Ostec, Sargans, Switzerland). For the Ca<sup>2+</sup> ISE, 10<sup>-2</sup> M Na<sub>2</sub>EDTA, 10<sup>-4</sup> M CaCl<sub>2</sub>, adjusted to pH 7.0 with NaOH, was used as inner filling solution. For the Pb<sup>2+</sup> ISE with a low detection limit, 10<sup>-2</sup> M Na<sub>2</sub>EDTA, 10<sup>-4</sup> M Pb(NO<sub>3</sub>)<sub>2</sub>, adjusted to pH 7.0 with NaOH, was used as inner filling solution.

### Instrumentations and measurements:

Potentiometric titration signals were recorded on an EMF-16 precision electrochemistry EMF interface from Lawson Laboratories, Inc. A double-junction Ag/AgCl was used as reference electrode (Mettler-Toledo AG, Schwerzenbach, Switzerland).

For potentiometric calcium titrations, samples were prepared by diluting 4 μL, 7 μL, 10 μL of 10<sup>-2</sup> M of CaCl<sub>2</sub> to 10 mL by water to obtain the Ca<sup>2+</sup> concentrations of 4×10<sup>-6</sup> M, 7×10<sup>-6</sup> M, and 10<sup>-5</sup> M, respectively. Ca<sup>2+</sup>-selective electrodes were used as endpoint detectors and Ca<sup>2+</sup>-selective emulsion as titration reagent.

For potentiometric lead titration, the samples were prepared by adding 30  $\mu\text{L}$ , 90  $\mu\text{L}$ , 180  $\mu\text{L}$  of  $10^{-4}$  M  $\text{Pb}(\text{NO}_3)_2$  to 30 mL water to obtain the  $\text{Pb}^{2+}$  concentrations  $10^{-7}$  M,  $3 \times 10^{-7}$  M, and  $6 \times 10^{-7}$  M, respectively.  $\text{Pb}^{2+}$ -selective electrodes were used as endpoint detectors and  $\text{Pb}^{2+}$ -selective emulsion as titration reagents.

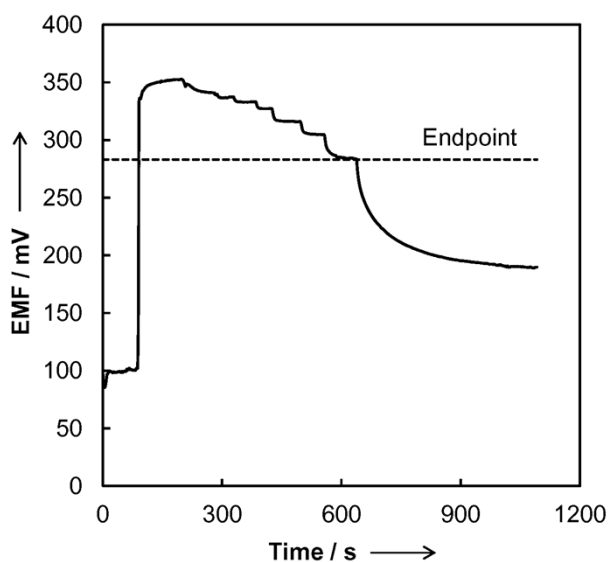

Fig. S1 Potentiometric titration curve for  $7 \times 10^{-6}$  M of  $\text{Ca}^{2+}$  in 10 mL non-buffered water. The volumes of the added calcium selective emulsion were 200  $\mu\text{L}$ ,  $4 \times 100 \mu\text{L}$ , 50  $\mu\text{L}$ ,  $2 \times 34 \mu\text{L}$  respectively. The concentration of the ion exchanger KTFPB in the calcium selective emulsion stock solution was  $2.05 \times 10^{-4}$  M. The endpoint appeared at 684  $\mu\text{L}$ . The amount of the KTFPB at the endpoint was 140 nano mole. The response time is less than 1 min before the endpoint, and mainly dictated by the response time of the ion-selective electrode used for the detection.

1 Y. Qin, S. Peper and E. Bakker, *Electroanalysis*, 2002, **14**, 1375.
